# Supplementary material for: Insight into the influence of the polymerization time of polydopamine nanoparticles on their size, surface properties and nanomedical applications
Source: Royal Society of Chemistry journal article supplement (doi:10.1039/d1py01473k), 2021-12-07
Supplement: d1py01473k1.pdf [file d1py01473k1.pdf]

## Electronic Supplementary information

### Insight into the influence of the polymerization time of polydopamine nanoparticles on their size, surface properties and nanomedical applications

**Table S1** PDA(EtOH) NP diameters as a function of the  $\text{NH}_4\text{OH}$  concentration used to produce them and the reaction time. Size values are those represented in Fig. 1(a).

| $\text{NH}_4\text{OH}$ (%V/V) | PDA(EtOH) NP diameter (nm) |              |              |              |              |
|-------------------------------|----------------------------|--------------|--------------|--------------|--------------|
|                               | 0.16 h                     | 1 h          | 3 h          | 5 h          | 24 h         |
| 1.19                          | 217.3 ± 52.9               | 313.3 ± 66.0 | 325.3 ± 65.6 | 341.9 ± 87.7 | 359.6 ± 77.5 |
| 1.58                          | 212.1 ± 47.3               | 278.0 ± 57.0 | 286.4 ± 57.6 | 286.9 ± 60.7 | 293.2 ± 58.9 |
| 1.98                          | 204.6 ± 48.1               | 220.3 ± 45.3 | 212.8 ± 49.8 | 219.1 ± 55.5 | 229.1 ± 45.9 |
| 2.60                          | 147.2 ± 55.6               | 164.8 ± 41.4 | 166.0 ± 36.4 | 171.9 ± 36.6 | 180.0 ± 39.9 |
| 3.00                          | 126.1 ± 41.7               | 138.3 ± 36.9 | 143.5 ± 36.9 | 152.7 ± 37.5 | 157.1 ± 40.7 |

**Table S2** PDA(2-PrOH) NP diameters as a function of the  $\text{NH}_4\text{OH}$  concentration used to produce them and the reaction time. Size values are those represented in Fig. 1(b).

| $\text{NH}_4\text{OH}$ (%V/V) | PDA(2-PrOH) NP diameter (nm) |              |              |              |              |
|-------------------------------|------------------------------|--------------|--------------|--------------|--------------|
|                               | 0.16 h                       | 1 h          | 3 h          | 5 h          | 24 h         |
| 1.19                          | 169.3 ± 54.6                 | 244.8 ± 52.6 | 254.0 ± 55.4 | 254.9 ± 53.2 | 274.9 ± 62.1 |
| 1.58                          | 148.4 ± 32.4                 | 179.0 ± 41.9 | 187.6 ± 41.6 | 194.2 ± 45.0 | 209.0 ± 58.2 |
| 1.98                          | 128.3 ± 68.1                 | 149.7 ± 35.0 | 155.5 ± 42.0 | 157.2 ± 36.2 | 167.4 ± 36.3 |

**Table S3** Yield of DA polymer as a function of the final polymerization time and the  $\text{NH}_4\text{OH}$  concentration used to produce PDA(ROH) NPs.

| ROH  | EtOH                |             | 2-PrOH      |             |             |             |
|------|---------------------|-------------|-------------|-------------|-------------|-------------|
|      | Final reaction time | 1.98% (V/V) | 2.60% (V/V) | 3.00% (V/V) | 1.58% (V/V) | 1.98% (V/V) |
| 1h   |                     | 11.7        | 6.88        | 3.9         | 9.9         | 3.6         |
| 3 h  |                     | 7.8         | 5.44        | 3.2         | 4.36        | 3.1         |
| 5 h  |                     | 6.9         | 5.62        | 3.3         | 5.32        | 2.4         |
| 24 h |                     | 6.9         | 5.52        | 2.6         | 5.22        | 2.2         |

**Table S4** Values obtained for the parameters of the mathematical model proposed to predict the PDA(ROH) NP diameter as a function of final reaction time and the NH<sub>4</sub>OH concentration and ROH used for their synthesis. Only *A* varied as a function of the ROH type because this parameter precisely represented ROH effect on the polymerization process. The rest of the parameters were the same for both types of PDA(ROH) NPs. Average NP diameter data fitting to all experimental data was performed by using the Generalized Reduced Gradient (GRG Nonlinear) tab in Excel<sup>®</sup> Solver Options, minimizing the residual sum of squares (RSS).

| Equation parameter                    | EtOH  | 2-PrOH |
|---------------------------------------|-------|--------|
| <i>A</i> (nm*(% (V/V)) <sup>x</sup> ) | 637.9 | 451.9  |
| <i>n</i> (d-less)                     | 0.27  | 0.27   |
| <i>x</i> (d-less)                     | 0.94  | 0.94   |
| <i>k</i> (min <sup>-1</sup> )         | 0.69  | 0.69   |

**Table S5** Comparison of PDA(EtOH) NP diameter values obtained experimentally and theoretically (Eq.1., *A* = 637.9) as a function of the NH<sub>4</sub>OH concentration and the final reaction time.

| Final reaction time / [NH <sub>4</sub> OH] | PDA (EtOH) NP diameter (nm) |                           |                                                     |
|--------------------------------------------|-----------------------------|---------------------------|-----------------------------------------------------|
|                                            | Model                       | Experimental              | Difference between model and experimental diameters |
| 1h / 1.98% (V/V)                           | 210                         | 227.1 ± 73.2 (PDI: 0.12)  | 17.1                                                |
| 3 h / 2.87% (V/V)                          | 151                         | 131.1 ± 35.6 (PDI: 0.047) | 19.1                                                |
| 5 h / 2.60% (V/V)                          | 170                         | 165.3 ± 44.2 (PDI: 0.044) | 4.7                                                 |
| 24 h / 2.76% (V/V)                         | 165                         | 177.4 ± 41.9 (PDI: 0.08)  | 12.4                                                |

**Table S6** Comparison of PDA(2-PrOH) NP diameter values obtained experimentally and theoretically (Eq.1., *A* = 451.9) as a function of the NH<sub>4</sub>OH concentration and the final reaction time.

| Final reaction time / [NH <sub>4</sub> OH] | PDA (2-PrOH) NP diameter (nm) |                           |                                                     |
|--------------------------------------------|-------------------------------|---------------------------|-----------------------------------------------------|
|                                            | Model                         | Experimental              | Difference between model and experimental diameters |
| 1h / 1.56% (V/V)                           | 180.5                         | 200.7 ± 39.29 (PDI: 0.1)  | 20.2                                                |
| 3 h / 1.98% (V/V)                          | 154.8                         | 158.3 ± 56 (PDI: 0.086)   | 3.5                                                 |
| 5 h / 1.81% (V/V)                          | 173                           | 170.4 ± 58.7 (PDI: 0.012) | 3.9                                                 |
| 24 h / 1.42% (V/V)                         | 223                           | 237.8 ± 67.4 (PDI: 0.058) | 14.8                                                |

**Table S7** Viability (%) of BT474 cells after treatment with the PDA(ROH) NPs (0.035 mg/mL) obtained after different reaction times. These values correspond to those represented in Fig. 9.

| BT474 cells<br>Final reaction time | PDA (EtOH) NPs |            |             | PDA (2-PrOH) NPs |            |            |
|------------------------------------|----------------|------------|-------------|------------------|------------|------------|
|                                    | 24 h           | 48 h       | 72 h        | 24 h             | 48 h       | 72 h       |
| 1h                                 | 79.6 ± 2.4     | 74.6 ± 1.3 | 71.2 ± 0.6  | 98.4 ± 6.8       | 78.1 ± 3.0 | 66.6 ± 1.3 |
| 3 h                                | 78.0 ± 3.9     | 73.7 ± 1.2 | 72.5 ± 0.19 | 96.6 ± 0.8       | 70.2 ± 2.6 | 60.3 ± 1.8 |
| 5 h                                | 77.0 ± 6.9     | 73.3 ± 6.0 | 71.8 ± 1.5  | 94.7 ± 7.0       | 71.6 ± 1.1 | 59.5 ± 1.8 |
| 24 h                               | 78.3 ± 9.5     | 72.5 ± 3.1 | 70.9 ± 3.2  | 93.8 ± 9.0       | 69.7 ± 1.8 | 60.1 ± 0.7 |

**Table S8** Viability (%) of HS5 cells after treatment with the PDA(ROH) NPs (0.035 mg/mL) obtained after different reaction times. These values correspond to those represented in Fig. 9.

| HS5 cells           | PDA (EtOH) NPs |            |            | PDA (2-PrOH) NPs |            |            |
|---------------------|----------------|------------|------------|------------------|------------|------------|
| Final reaction time | 24 h           | 48 h       | 72 h       | 24 h             | 48 h       | 72 h       |
| 1 h                 | 94.9 ± 5.5     | 87.6 ± 2.4 | 75.3 ± 0.8 | 92.3 ± 3.2       | 87.2 ± 3.4 | 84.2 ± 4.3 |
| 3 h                 | 92.5 ± 6.1     | 88.7 ± 2.7 | 77.0 ± 1.2 | 96.9 ± 4.8       | 88.9 ± 5.4 | 82.2 ± 2.7 |
| 5 h                 | 96.4 ± 3.6     | 86.7 ± 4.3 | 75.4 ± 5.3 | 97.1 ± 2.6       | 86.7 ± 1.6 | 82.2 ± 1.9 |
| 24 h                | 95.0 ± 4.0     | 86.3 ± 6.5 | 74.0 ± 1.0 | 95.9 ± 8.0       | 88.5 ± 3.9 | 84.5 ± 0.2 |

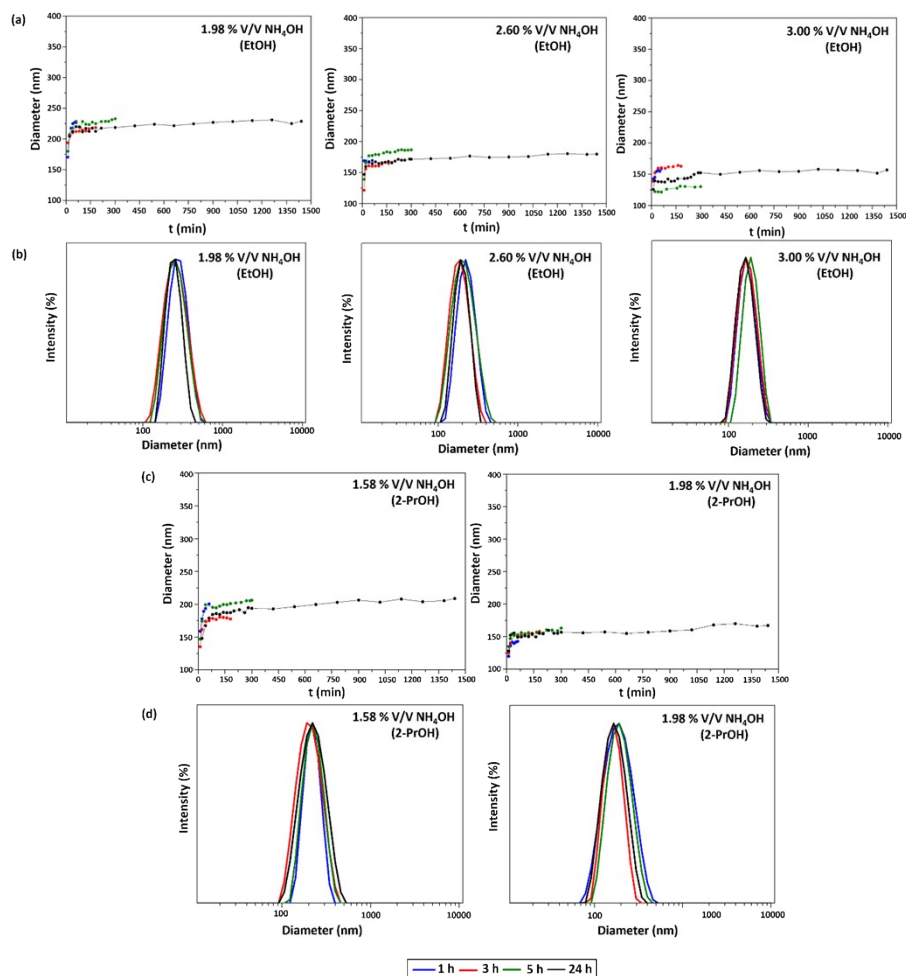

**Fig. S1 (a-b)** Formation kinetics and DLS intensity distribution of PDA(EtOH) NPs produced with different NH<sub>4</sub>OH concentrations (1.98, 2.60 and 3.00% (V/V)), **(c-d)** Formation kinetics and DLS intensity distribution of PDA(2-PrOH) NPs produced with different NH<sub>4</sub>OH concentrations (1.58 and 1.98% (V/V)).

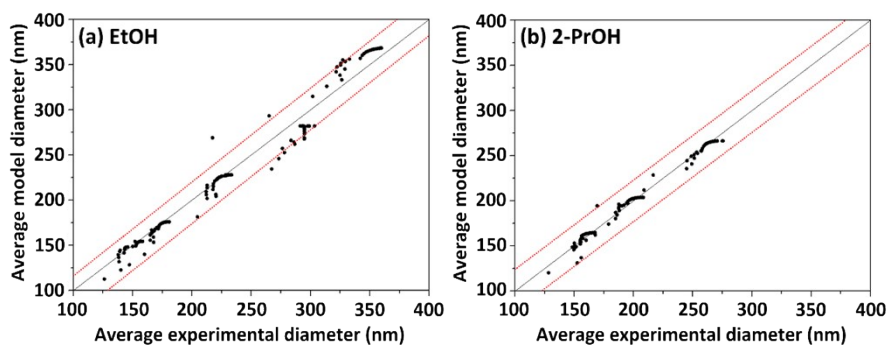

Fig. S2 Parity plot of experimental vs. model average size values of (a) PDA(EtOH) NPs and (b) PDA(2-PrOH) NPs.

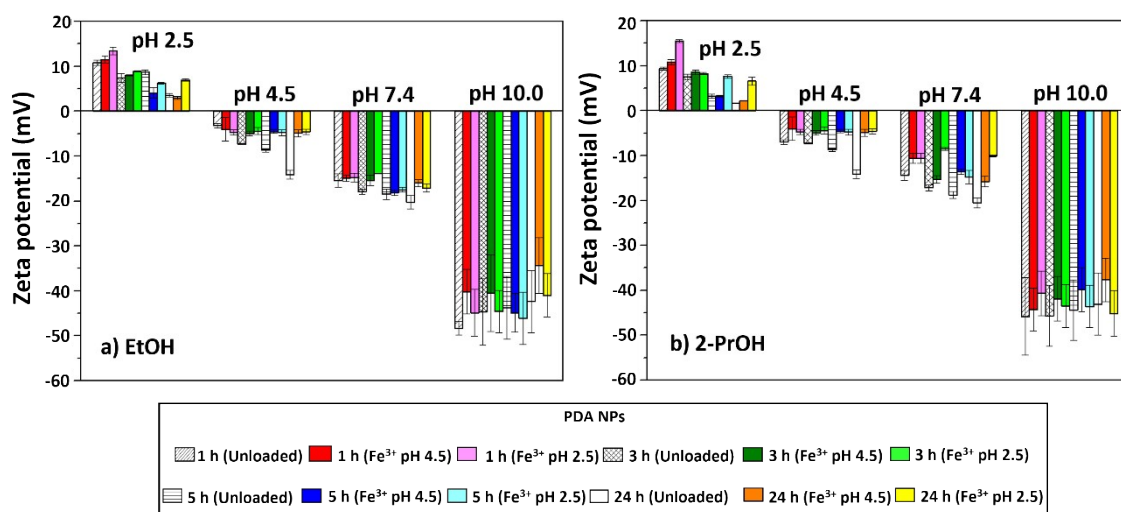

Fig. S3 Comparison of the zeta potential of all PDA(EtOH) (a) and PDA(2-PrOH) NPs at different pH values before and after loading them with  $Fe^{3+}$  at pH 2.5 and 4.5.

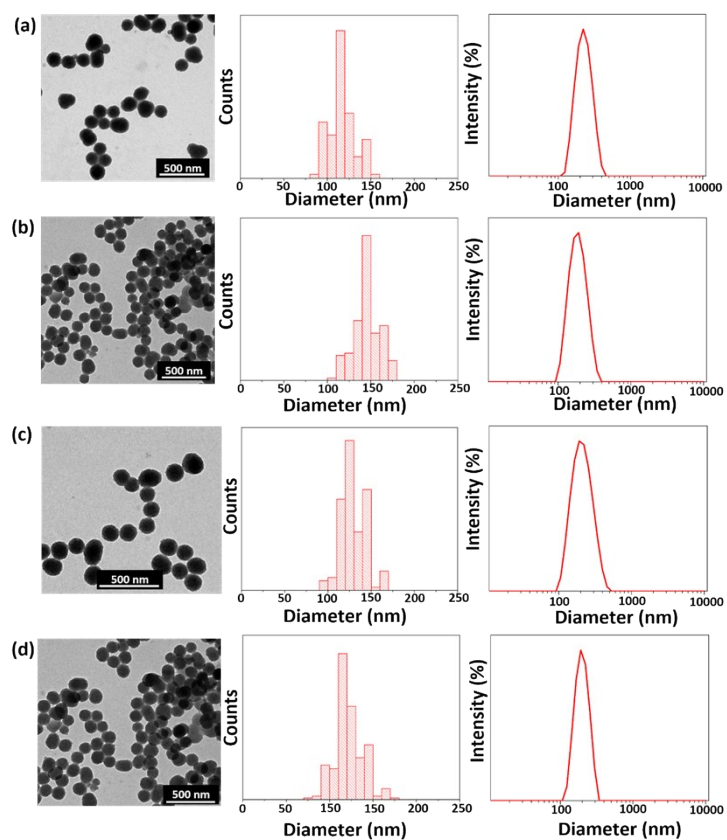

**Fig. S4** TEM images, size histograms and DLS intensity distributions of the PDA(EtOH) NPs obtained after different reactions times to perform viability assays: **(a)** 1 h ( $117.2 \pm 15$  nm), **(b)** 3 h ( $145.5 \pm 14.6$  nm), **(c)** 5 h ( $129.7 \pm 14$  nm) and **(d)** 24 h ( $122.6 \pm 16.2$  nm).

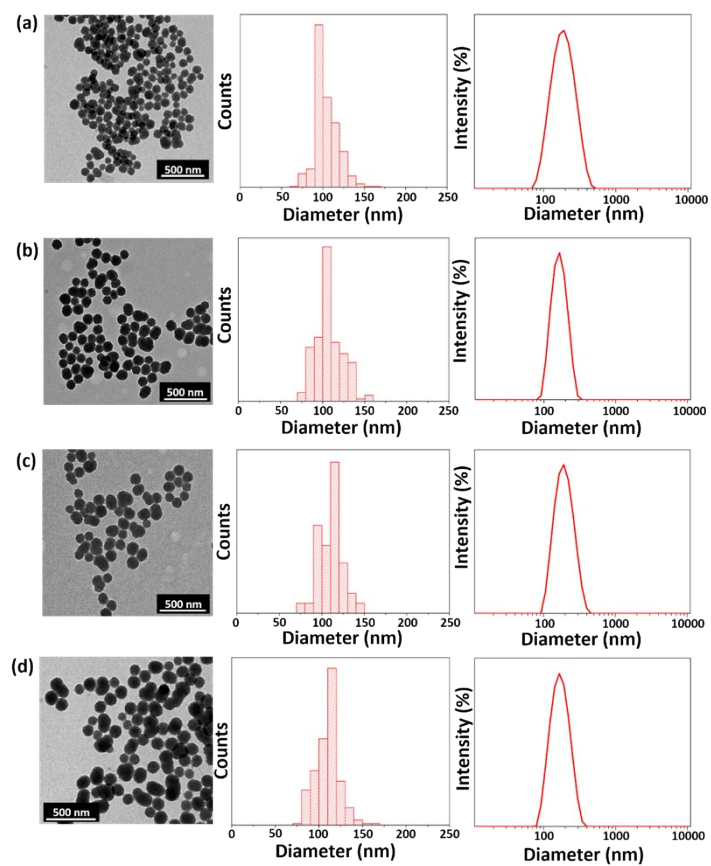

**Fig. S5** TEM images, size histograms and DLS intensity distributions of the PDA(2-PrOH) NPs obtained after different reactions times to perform viability assays: **(a)** 1 h ( $103.7 \pm 14.9$  nm), **(b)** 3 h ( $107.6 \pm 15.7$  nm), **(c)** 5 h ( $110.6 \pm 14.2$  nm) and **(d)** 24 h ( $110.3 \pm 14.3$  nm).
